# Supplementary material for: A highly selective fluorescent sensor for Al3+ based on a new diarylethene with a 3-hydroxy-2-naphthohydrazide unit
Source: Royal Society of Chemistry journal article supplement (doi:10.1039/c6ra18068j), 2016-01-01
Supplement: c6ra18068j1.pdf [file c6ra18068j1.pdf]

## Supplementary Information (SI)

# A highly selective fluorescent sensor for Al<sup>3+</sup> based on a new diarylethene with a 3-hydroxy-2-naphthohydrazide unit

Shiqiang Cui,<sup>\*a</sup> Yongjuan Tang<sup>a</sup> and Shouzhi Pu<sup>\*a</sup>

*Jiangxi Key Laboratory of Organic Chemistry, Jiangxi Science and Technology Normal*

*University, Nanchang 330013, PR China*

\*Corresponding author: E-mail: [cuisq2006@163.com](mailto:cuisq2006@163.com) (S. Cui); [pushouzhi@tsinghua.org.cn](mailto:pushouzhi@tsinghua.org.cn) (S. Pu); Tel./Fax: +86-791-83831996.

### Content

|                                                                                                                                                                                                                                           |   |
|-------------------------------------------------------------------------------------------------------------------------------------------------------------------------------------------------------------------------------------------|---|
| <b>1. Supplementary data.</b> .....                                                                                                                                                                                                       | 1 |
| <b>Fig. S1.</b> (a) <b>1o''</b> by irradiating with UV light, (b) <b>1c''</b> by irradiating with visible light.....                                                                                                                      | 2 |
| <b>Fig. S2.</b> ESI-MS spectrum changes of <b>1o</b> and <b>1o</b> induced by Al <sup>3+</sup> in methanol. ....                                                                                                                          | 3 |
| <b>Fig. S3.</b> (a) Hildebrand-Benesi plot based on the 1:1 for <b>1o</b> with $K_a = 4.88 \times 10^4 \text{ L mol}^{-1}$ .<br>(b) The limit of detection for <b>1o</b> with $\text{LOD} = 2.2 \times 10^{-9} \text{ mol L}^{-1}$ . .... | 4 |
| <b>2. NMR spectra.</b> .....                                                                                                                                                                                                              | 5 |
| <b>Fig. S4.</b> <sup>1</sup> H NMR (400 MHz, DMSO) spectrum of <b>1o</b> . ....                                                                                                                                                           | 5 |
| <b>Fig. S5.</b> <sup>13</sup> C NMR (100 MHz, DMSO) spectrum of <b>1o</b> . ....                                                                                                                                                          | 6 |

## 1. Supplementary data

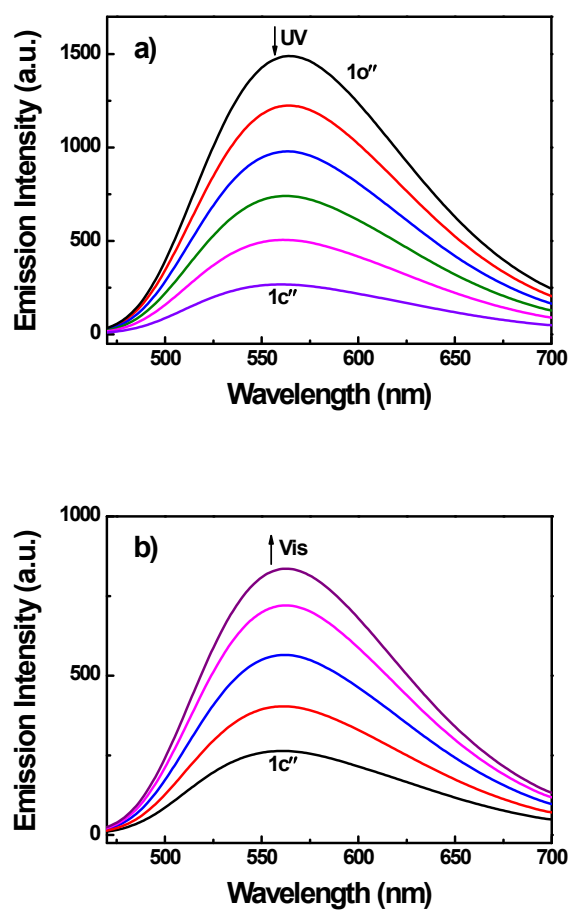

**Fig. S1.** (a)  $1\mathbf{o}''$  by irradiating with UV light, (b)  $1\mathbf{c}''$  by irradiating with visible light.

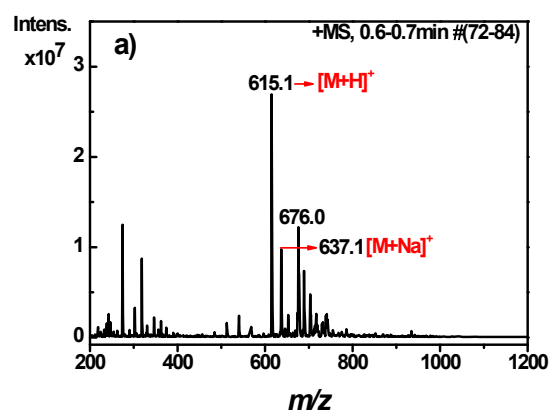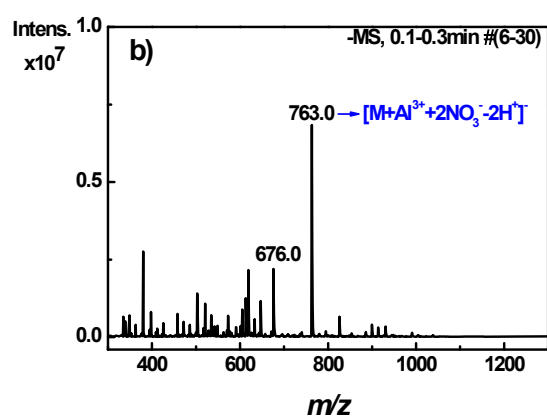

**Fig. S2.** ESI-MS spectrum changes of **1o** and **1o** induced by  $Al^{3+}$  in methanol.

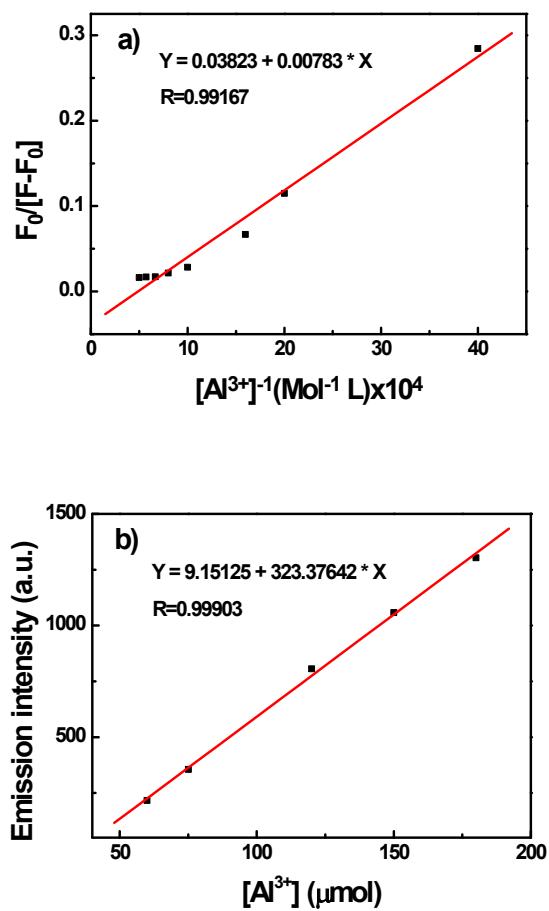

**Fig. S3.** (a) Hildebrand-Benesi plot based on the 1:1 for **1o** with  $K_a = 4.88 \times 10^4 \text{ L mol}^{-1}$ . (b) The limit of detection for **1o** with  $LOD = 2.2 \times 10^{-9} \text{ mol L}^{-1}$ .

## 2. NMR spectra

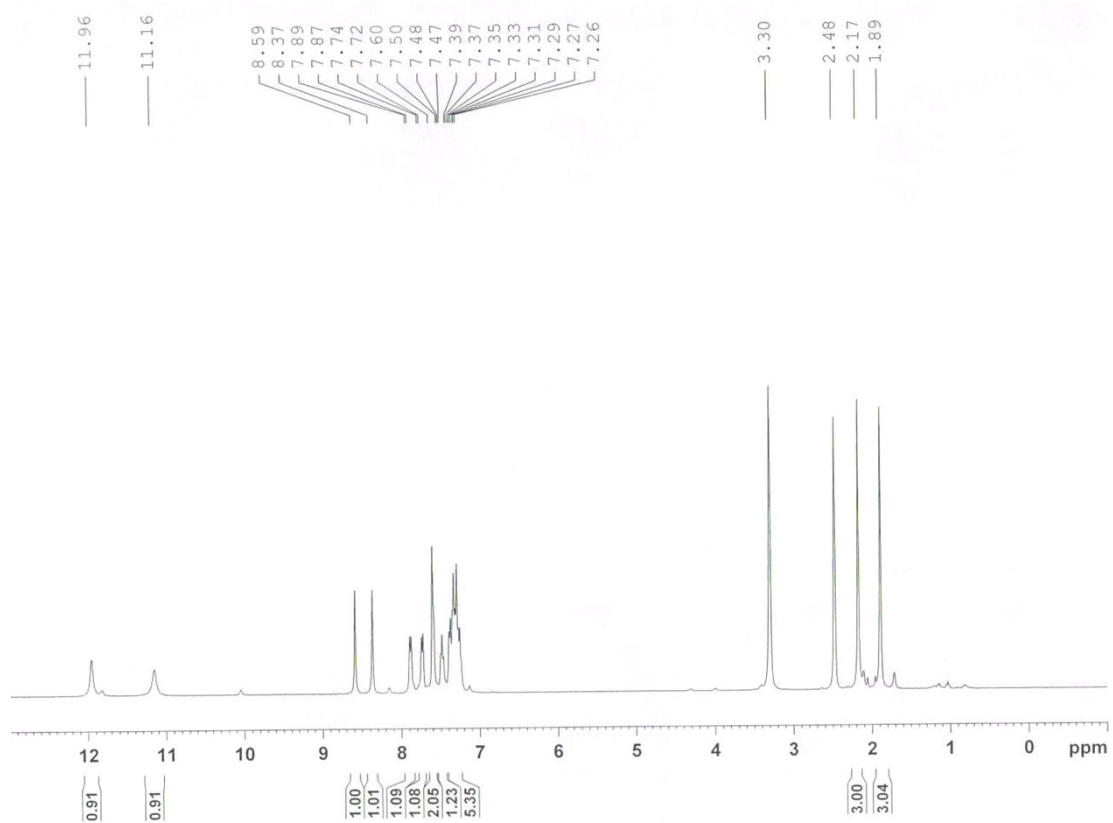

**Fig. S4.**  $^1\text{H}$  NMR (400 MHz, DMSO) spectrum of **1o**.

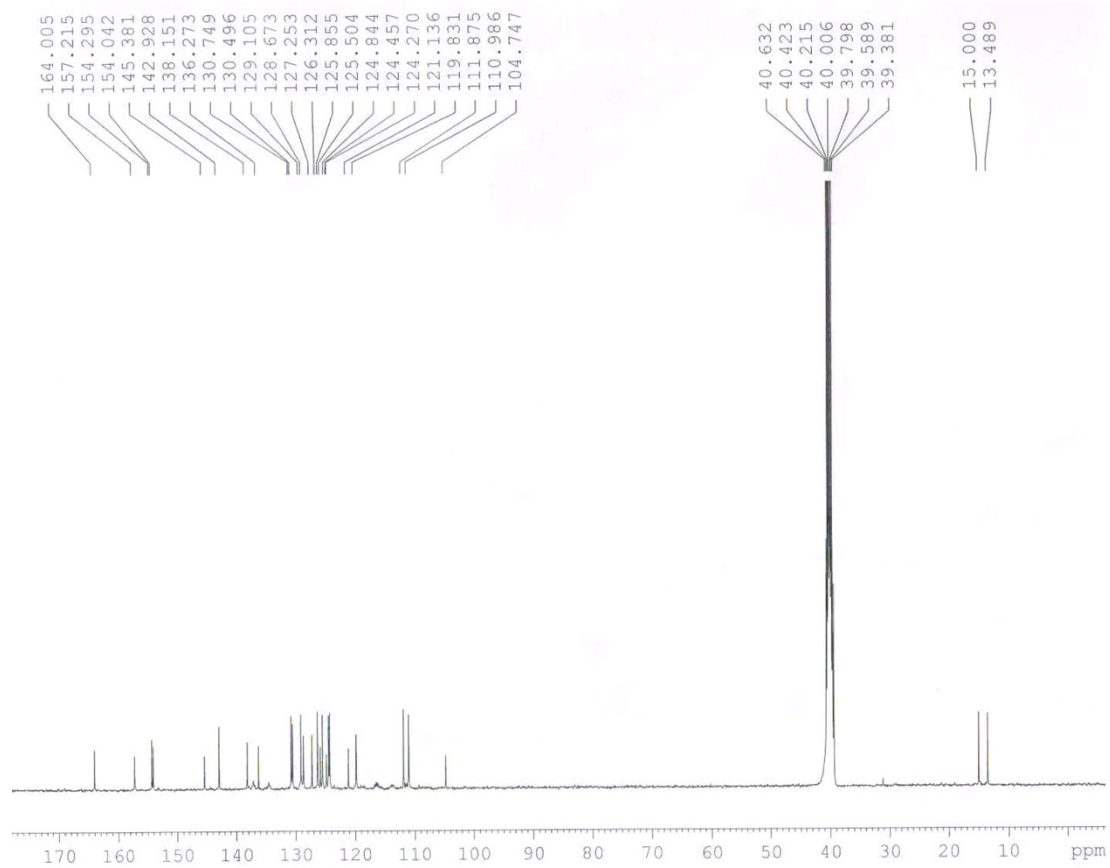

**Fig. S5.**  $^{13}\text{C}$  NMR (100 MHz, DMSO) spectrum of **10**.
